# Supplementary material for: Relapsed multiple myeloma demonstrates distinct patterns of immune microenvironment and malignant cell-mediated immunosuppression
Source: PubMed Central journal article supplement (PMC7921408; doi:10.1038/s41408-021-00440-4), 2021-03-01
Supplement: 41408_2021_440_MOESM1_ESM.pdf [file 41408_2021_440_MOESM1_ESM.pdf]

## Supplemental Methods

### *Antibody and sample preparation*

For primary conjugations, purified antibodies were obtained in carrier protein-free PBS and labeled using the X8 polymer MaxPAR antibody conjugation kit (Fluidigm) according to the manufacturer's protocol. The antibody panel was designed using the web-based Fluidigm panel designer to select channels with optimal signal and minimal background from oxidation, isotopic impurity or abundance sensitivity. All antibodies were titrated to optimal staining concentrations using primary human bone marrows of patients with MM. Antibody master mixes were prepared fresh for each experiment. A reference sample was run with each experiment to evaluate for staining inconsistencies. All BM samples were processed identically. Mononuclear cells were obtained after ACK lysis of BM samples and were viably frozen in RPMI 1640, 20%FBS, 10% DMSO. Cryopreserved cells were resuscitated for mass cytometry analyses by rapid thawing and were rested in RPMI 1640 (20% FBS) for 60 minutes prior to staining. Staining was performed using Fluidigm's protocol. Briefly, 1-3 million cells were stained for viability with 5mM cisplatin for 5 mins at room temperature and quenched with cell staining medium (CSM, Fluidigm). Cells were then incubated for 10 mins at room temperature with human FcR blocking reagent (Biolegend) and then stained with the surface antibody cocktail for 60mins at 4°C with gentle agitation. Finally, cells were washed twice with CSM, fixed with 1.6% PFA, washed with CSM and resuspended in 1:1000 solution of Iridium intercalator diluted in MaxPar Fix and Perm buffer (Fluidigm) for 20mins at room temperature. Prior to acquisition, cells were washed twice in CSM and twice in deionized water and were then diluted to a concentration 0.5million cells/ml in water containing 10% of EQ 4 Element Beads (Fluidigm). Cells were filtered through a 35µm membrane prior to mass cytometry acquisition. Samples were then acquired on a Helios mass cytometer.

**Supplemental table 1.**CytOF antibody panel

| <b>Target</b>  | <b>Clone</b> | <b>Metal tag</b> | <b>Source</b> |
|----------------|--------------|------------------|---------------|
| CD45           | HI30         | 89Y              | Fluidigm      |
| CD196 (CCR6)   | G034E3       | 141Pr            | Fluidigm      |
| CD19           | HIB19        | 142Nd            | Fluidigm      |
| CD127 (IL-7Ra) | A019D5       | 143Nd            | Fluidigm      |
| CD38           | HIT2         | 144Nd            | Fluidigm      |
| KLRG1          | A1           | 145Nd            | Biolegend*    |
| CD69           | FN50         | 146Nd            | Biolegend*    |
| CD159a (NKG2A) | Z199         | 147Sm            | R&D systems*  |
| CD95/Fas       | DX2          | 148Nd            | Biolegend*    |
| CD194 (CCR4)   | 205410       | 149Sm            | Fluidigm      |
| CD134 (OX40)   | ACT35        | 150Nd            | Fluidigm      |
| CD103          | Ber-ACT8     | 151Eu            | Fluidigm      |
| TCRgd          | 11F2         | 152Sm            | Fluidigm      |
| TIGIT          | MBSA43       | 153Eu            | Fluidigm      |
| TIM-3          | F38-2E2      | 154Sm            | Fluidigm      |
| CD45RA         | HI100        | 155Gd            | Fluidigm      |
| CD195 (CCR5)   | NP-6G4       | 156Gd            | Fluidigm      |
| CD27           | L128         | 158Gd            | Fluidigm      |
| TACI           |              | 159Tb            | Biolegend*    |
| CD28           | CD28.2       | 160Gd            | Fluidigm      |
| CD279 (PD-1)   | EH12.2H7     | 161Dy            | Biolegend*    |
| CD183 (CXCR3)  | G025H7       | 163Dy            | Fluidigm      |
| CD161          | HP-3G10      | 164Dy            | Fluidigm      |
| CD45RO         | UCHL1        | 165Ho            | Fluidigm      |
| CD314 (NKG2D)  | ON72         | 166Er            | Fluidigm      |
| CD197 (CCR7)   | G043H7       | 167Er            | Fluidigm      |
| CD8a           | SK1          | 168Er            | Fluidigm      |
| CD25 (IL-2R)   | 2A3          | 169Tm            | Fluidigm      |
| CD3            | UCHT1        | 170Er            | Fluidigm      |
| CD226          | DX11         | 171Yb            | Fluidigm      |
| CD57           | HCD57        | 172Yb            | Fluidigm      |
| HLA-DR         | L243         | 173Yb            | Fluidigm      |
| CD4            | SK3          | 174Yb            | Fluidigm      |
| CD39           | A1           | 175Lu            | Biolegend*    |
| CD56 (NCAM)    | NCAM16.2     | 176Yb            | Fluidigm      |
| CD16           | 3G8          | 209Bi            | Fluidigm      |

\* These antibodies were conjugated to their respective metal tags using the X8 polymer MaxPAR antibody conjugation kit (Fluidigm) according to the manufacturer's protocol.

**Supplemental table 2. Definitions of major lymphoid cell phenotypes**

|                           |                      |
|---------------------------|----------------------|
| <b>B Cells</b>            | CD19+                |
| <b>NK Cells</b>           | CD56+, CD16+/dim     |
| <b>T Cells</b>            | CD3+, CD4+ or CD8+   |
| <b>Naïve</b>              | CCR7+, CD45RO-       |
| <b>Central memory</b>     | CCR7+, CD45RO+       |
| <b>Effector memory</b>    | CCR7-, CD45RO+       |
| <b>Effector</b>           | CCR7-, CD45RO-       |
| <b>T regulatory cells</b> | CD25+, CD127-, CCR4+ |

**Supplemental Table 3. Characteristics of multiple myeloma patients at diagnosis and at the time of sample collection**

|                                                                        | NDMM (n=13)     | RMM (n=11)        | TRMM (n=15)       | P value |
|------------------------------------------------------------------------|-----------------|-------------------|-------------------|---------|
| <b>Diagnosis data</b>                                                  |                 |                   |                   |         |
| Median age - years (range)                                             | 60 (42.9-82.2)  | 50.7 (41.2-68.8)  | 59.4 (54.9-67.3)  | 0.463   |
| R-ISS                                                                  |                 |                   |                   | 0.116   |
| 1 - n (%)                                                              | 3 (25)          | 0                 | 5 (36)            |         |
| 2 - n (%)                                                              | 7 (58)          | 5 (83)            | 9 (64)            |         |
| 3 - n (%)                                                              | 2 (17)          | 1 (17)            | 0                 |         |
| FISH                                                                   |                 |                   |                   | 0.198   |
| Standard risk - n (%)                                                  | 8 (62)          | 10 (91)           | 8 (67)            |         |
| High risk <sup>a</sup> - n (%)                                         | 5 (38)          | 1 (9)             | 4 (33)            |         |
| Median follow up from diagnosis - months (IQR)                         | 69 (16.7-122.1) | 94.7 (60.9-120.7) | 75.1 (56.6-126.1) | 0.469   |
| Median lines of therapy between diagnosis and last follow up - n (IQR) | 6 (3.5-10)      | 6 (4-8)           | 9 (7-10)          | 0.199   |
| <b>At sample collection</b>                                            |                 |                   |                   |         |
| Median age - years (range)                                             | 60 (43-82)      | 58 (42-77)        | 69 (57-83)        | 0.075   |
| Median time between diagnosis and sample collection - months (IQR)     | 0 (0-0.5)       | 8.9 (5.2-28.4)    | 71.4 (48.2-118.3) | <0.0001 |
| Median prior lines of therapy - n (IQR)                                | 0               | 2 (1-2)           | 6 (4-8)           | <0.0001 |
| FISH                                                                   |                 |                   |                   | 0.19    |
| Standard risk - n (%)                                                  | 8 (62)          | 6 (86)            | 7 (47)            |         |
| High risk <sup>a</sup> - n (%)                                         | 5 (38)          | 1 (14)            | 8 (53)            |         |
| <b>Prior therapy</b>                                                   |                 |                   |                   |         |
| ASCT - n (%)                                                           | 0               | 4 (36)            | 13 (87)           | <0.0001 |
| PI exposure - n (%)                                                    | 0               | 7 (64)            | 15 (100)          | <0.0001 |
| IMiD exposure - n (%)                                                  | 0               | 11 (100)          | 15 (100)          | <0.0001 |
| Anti-CD38 Antibody exposure - n (%)                                    | 0               | 0                 | 15 (100)          | <0.0001 |

<sup>a</sup>High risk FISH is defined as the presence of del(17p), t(4;14), or t(14;16)

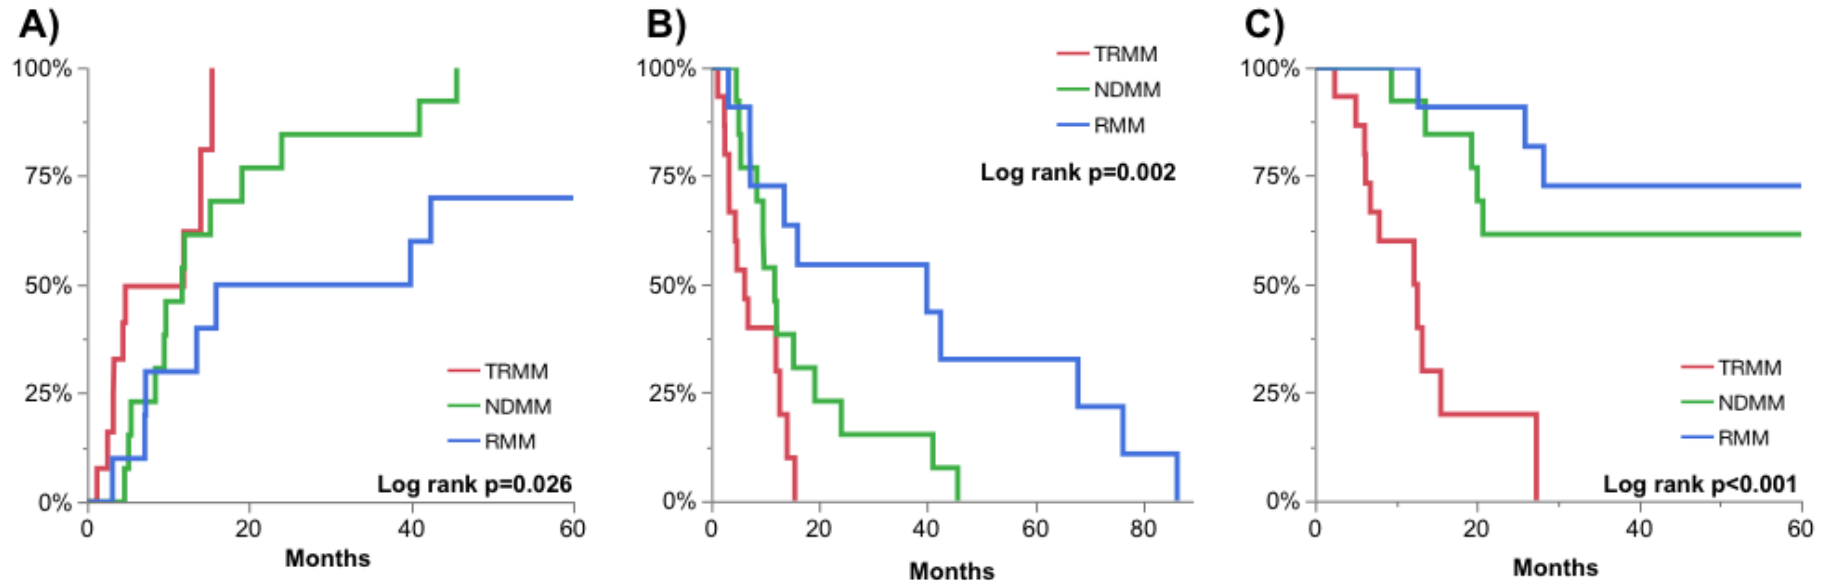

**Supplementary Figure 1.** Progression and survival of patients by treatment group. A) time to progression, B) progression free survival, C) overall survival. As expected, the triple refractory (DRMM) group fared consistently worse. However, this newly diagnosed (NDMM) cohort in this study had an unusually aggressive course, with a worse TTP, PFS, and OS compared to the relapsed (RMM) cohort. **NDMM:** newly diagnosed myeloma, **RMM:** relapsed myeloma, non-triple refractory, **TRMM:** triple refractory MM.

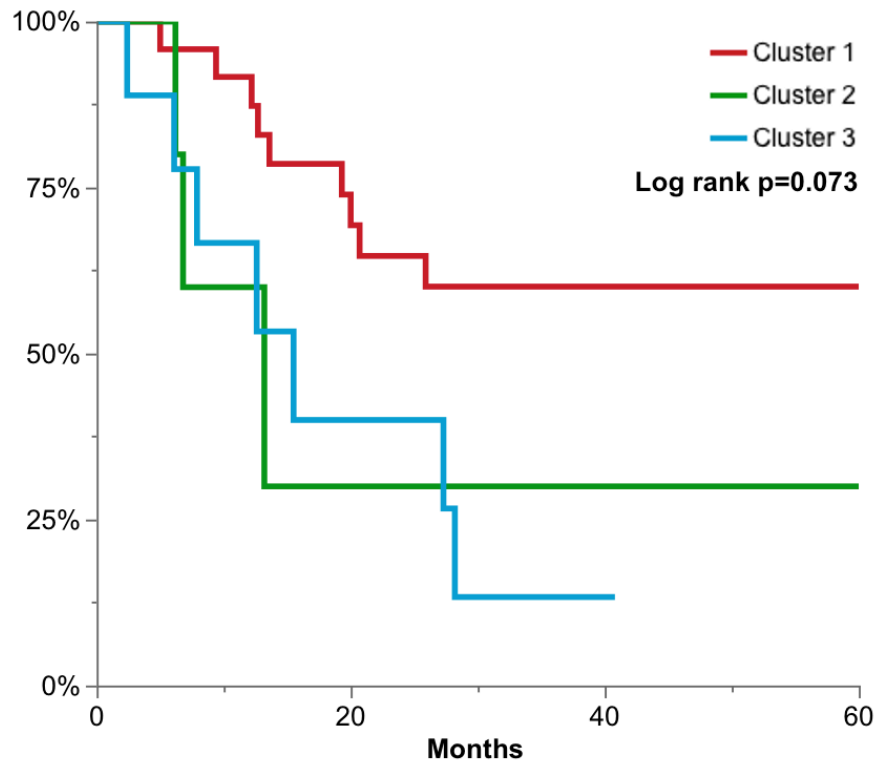

**Supplementary Figure 2.** Overall survival from time of the sample collection to last follow up is shown for myeloma patients, clustered by the immune subset frequencies.
